# Supplementary material for: Identification of stromal microenvironment characteristics and key molecular mining in pancreatic cancer
Source: Research Square preprint supplement (doi:10.21203/rs.3.rs-1632849/v1), 2022-05-16
Supplement: Supplementary file 1 [file 773af97038426aa3231293ed.docx]

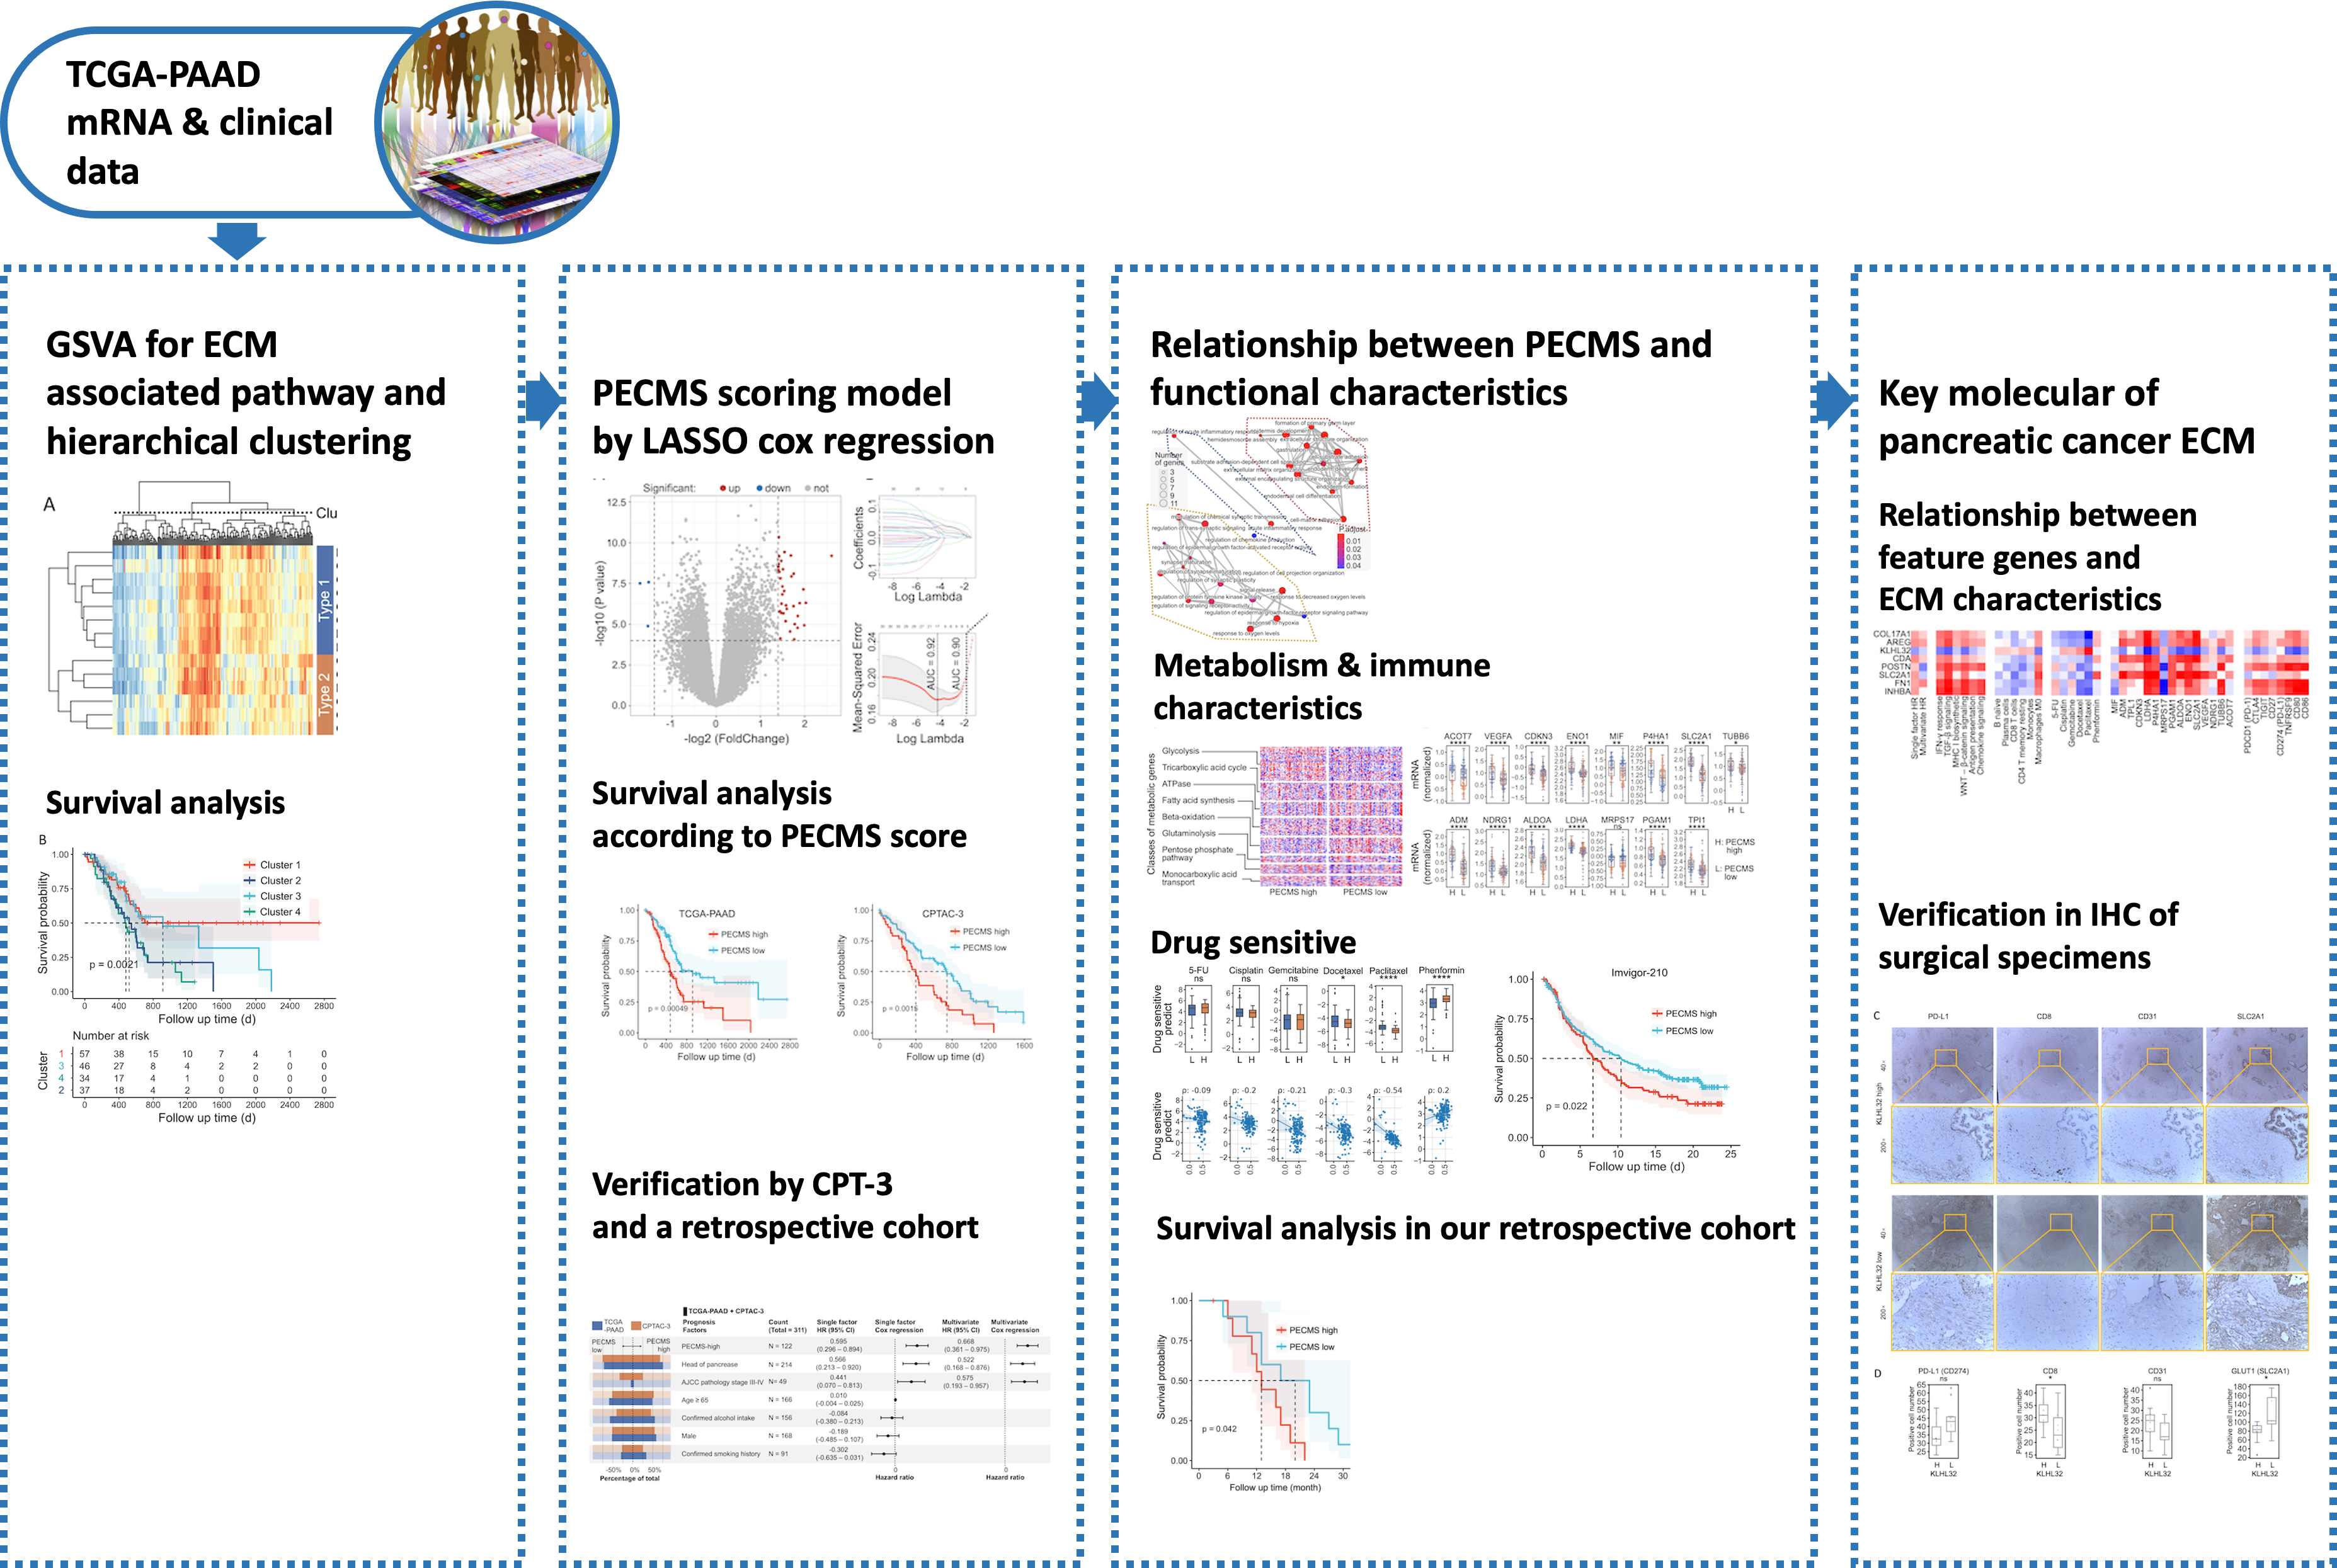


**Supplementary Fig. S1** Flowchart of this study


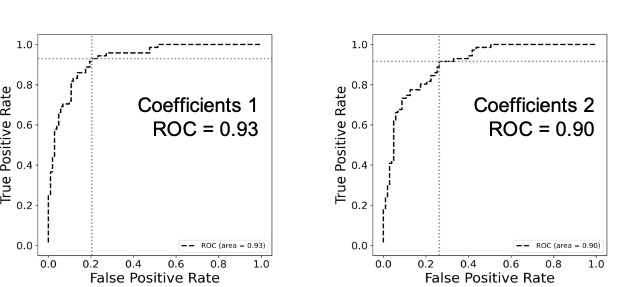


**Supplementary Fig. S2** ROC curve of the Lasso model (Coefficient 1 was obtained at the minimum MSE, and coefficient 2 was obtained at 1 SE MSE. Cutoff values were obtained based on the Youden index)


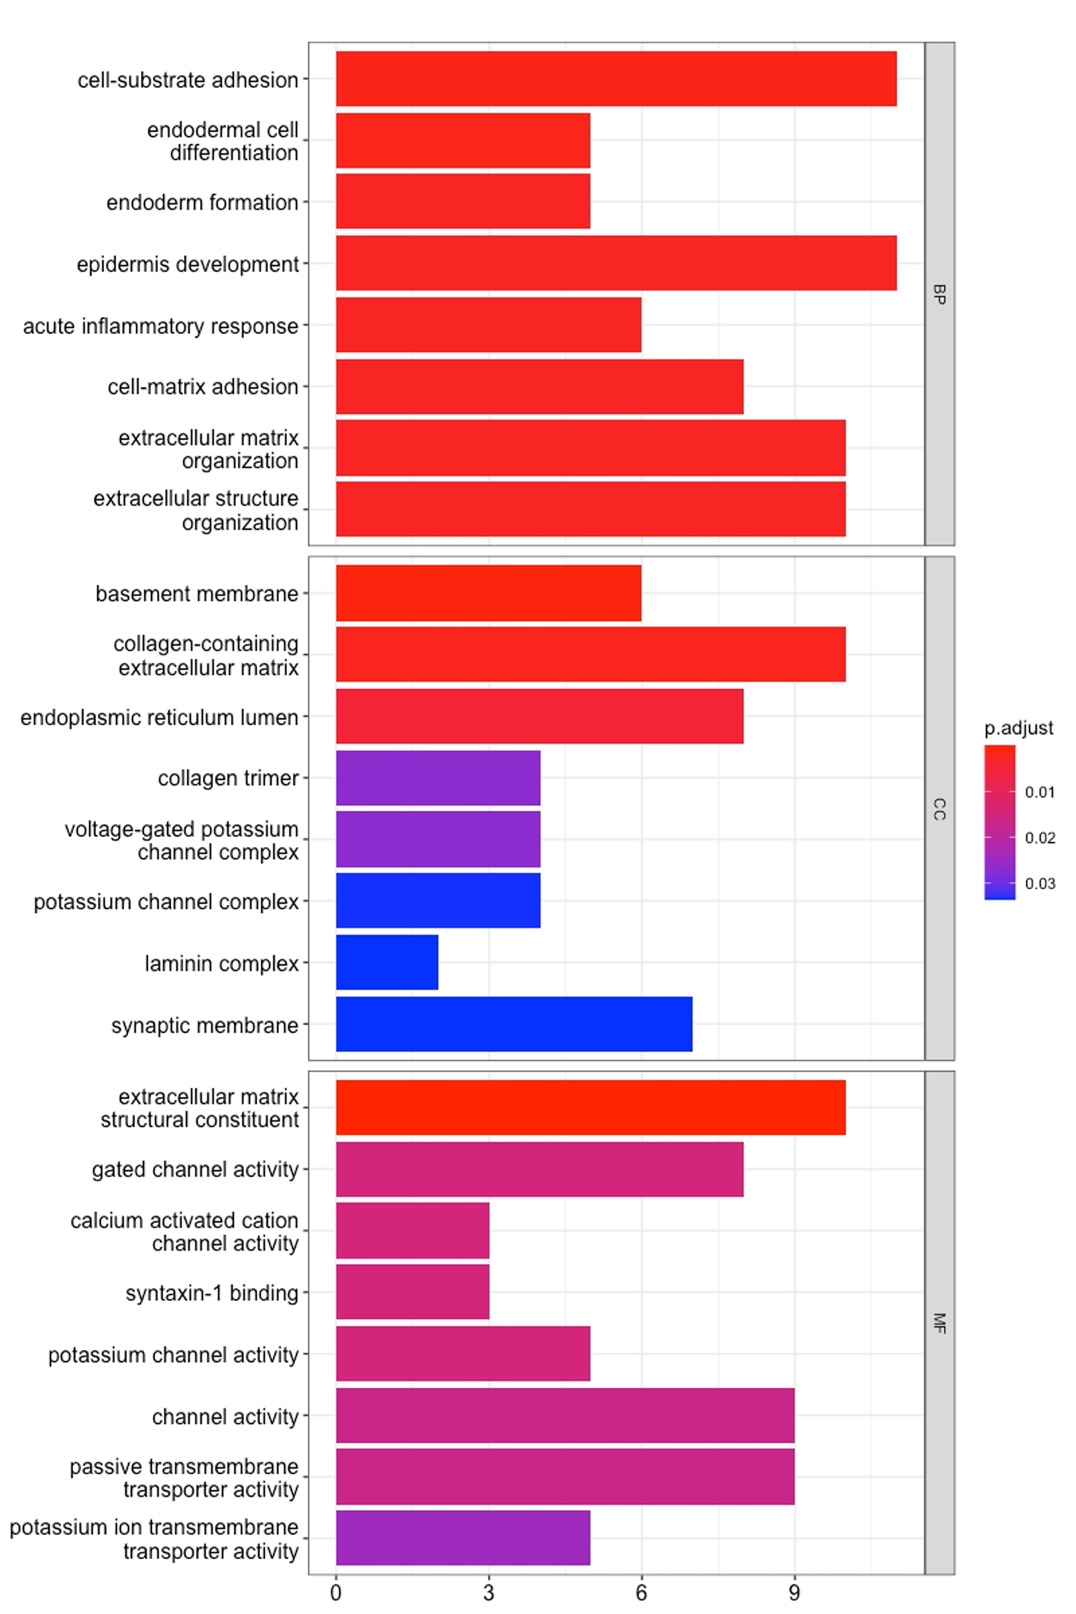


**Supplementary Fig. S3** GO enrichment analysis between PECMS groups


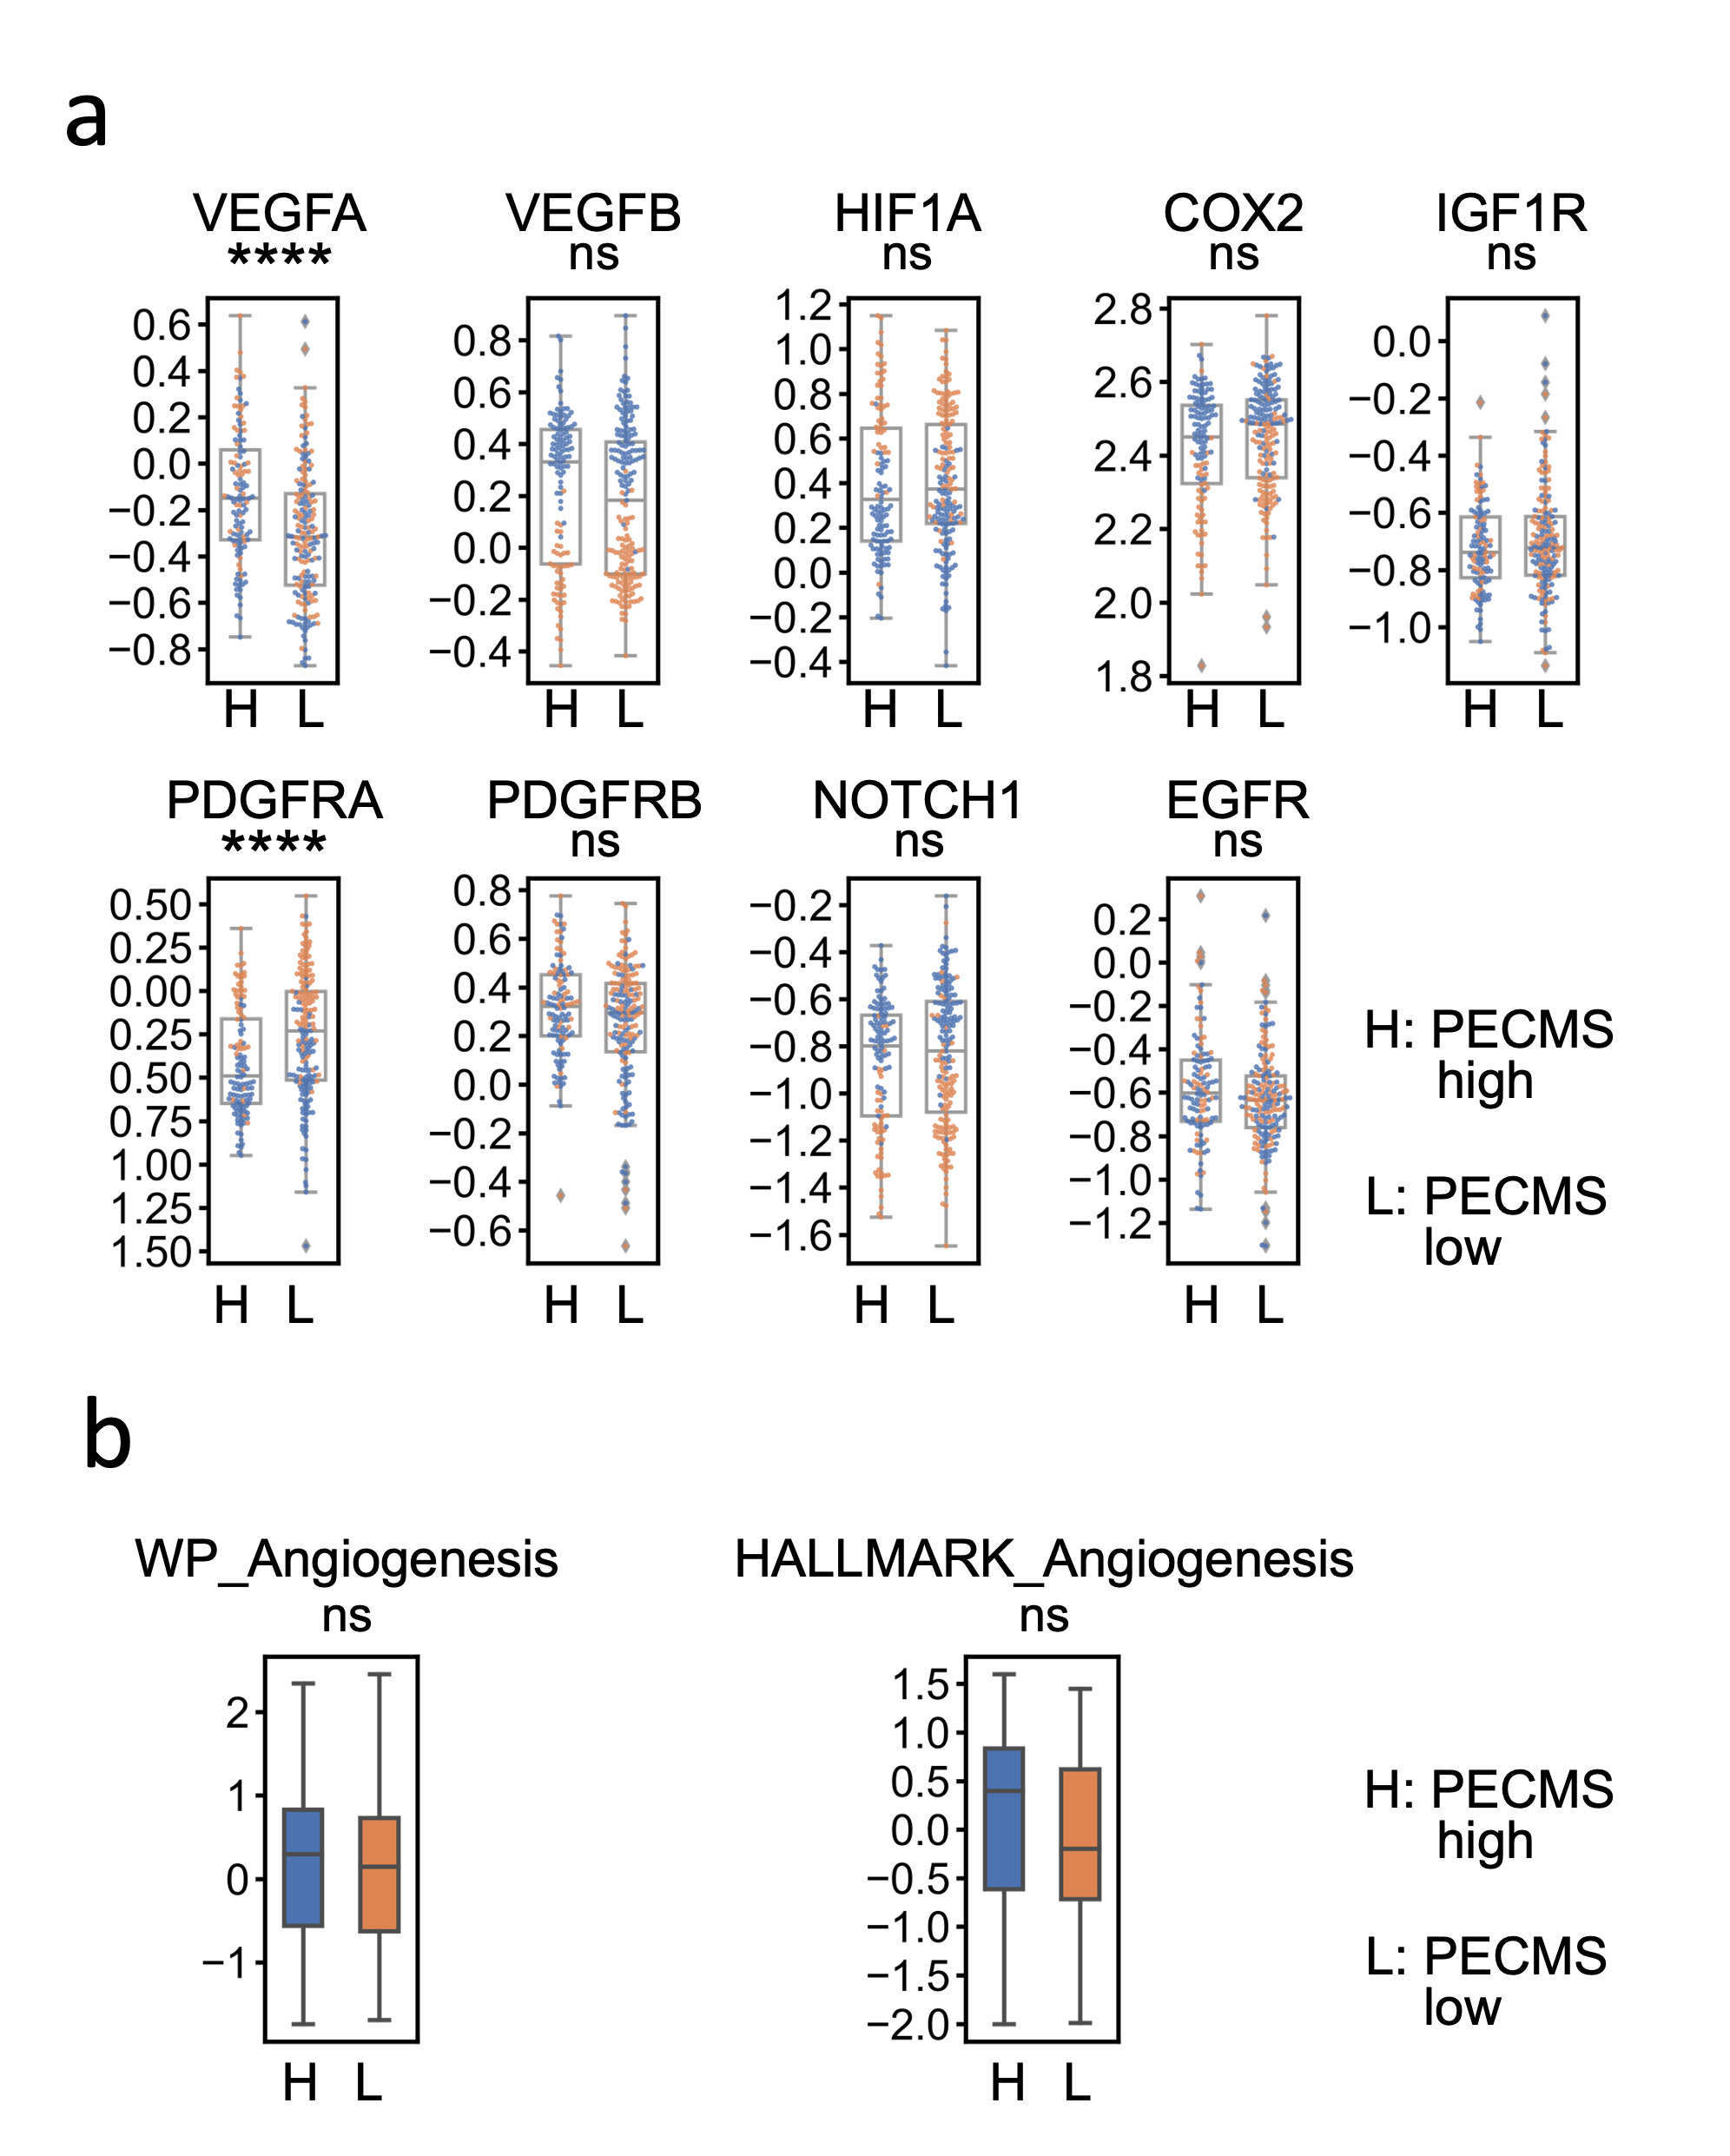


**Supplementary Fig. S4** Level of angiogenesis marker genes and pathway GSVA scores between PECMS groups (ns: no significant difference; *: P<0.05; **: P<0.005; ***: P<0.0005; ****: P<0.00005)


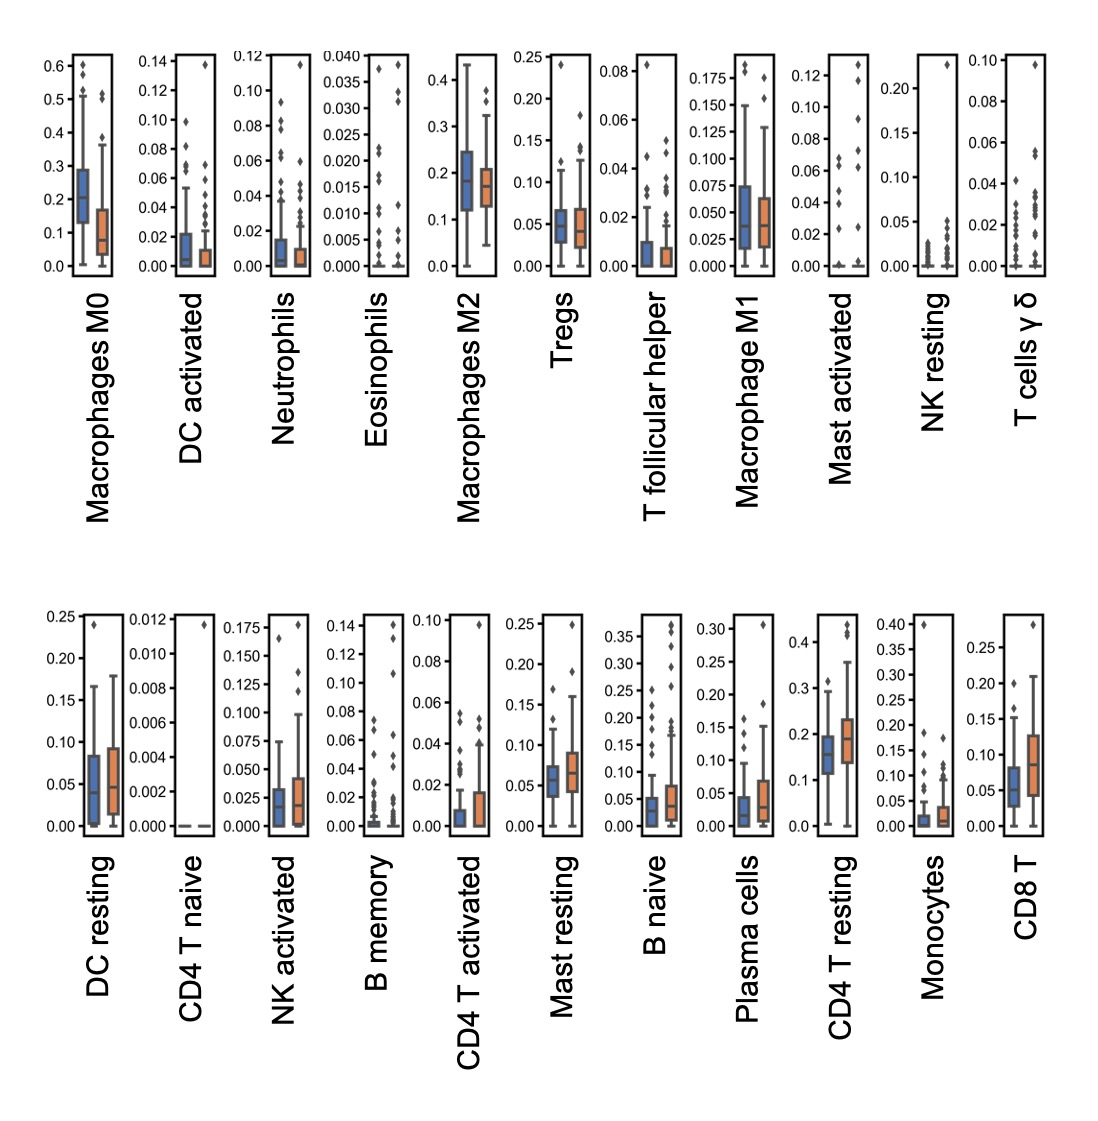


**Supplementary Fig. S5** CIBERSORT score value of different infiltrating immune cells between PECMS groups


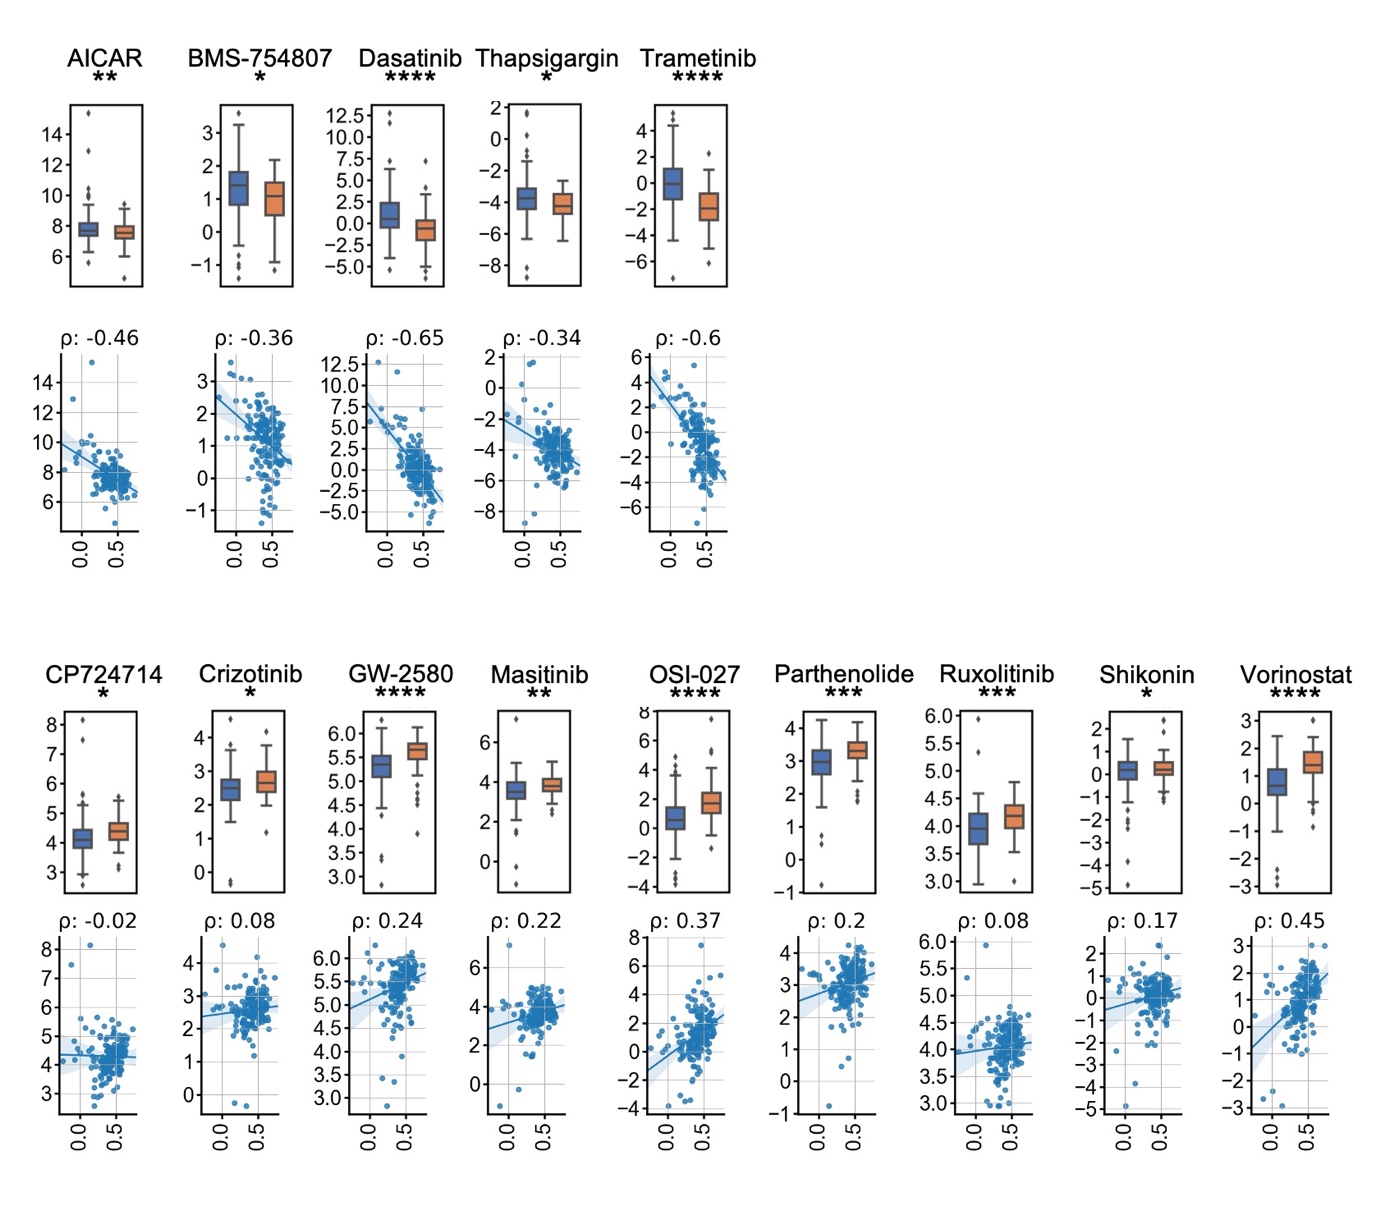


**Supplementary Fig. S6** Predictive value of molecular targeted drugs between PECMS groups (ns: no significant difference; *: P<0.05; **: P<0.005; ***: P<0.0005; ****: P<0.00005)


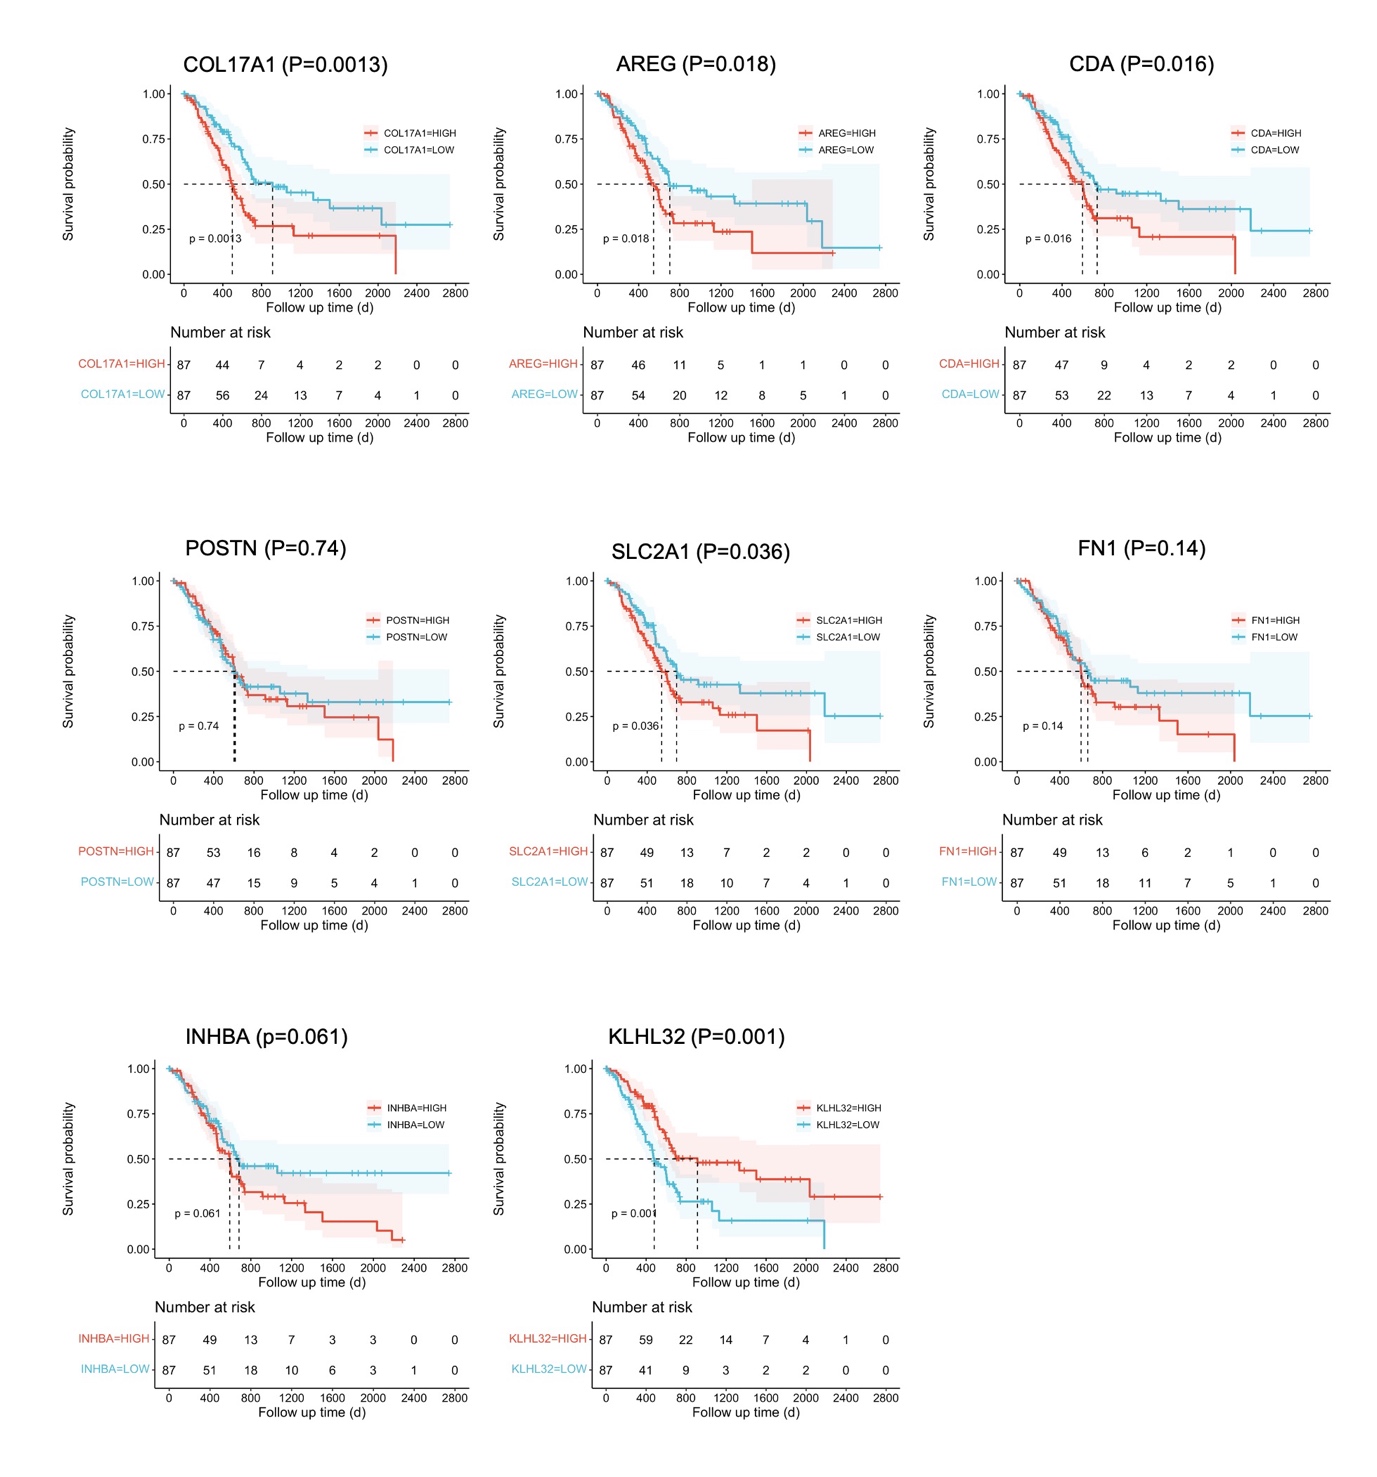


**Supplementary Fig. S7** Survival curve of TCGA-PAAD. The patients were divided by the median value of PECMS feature gene mRNA levels


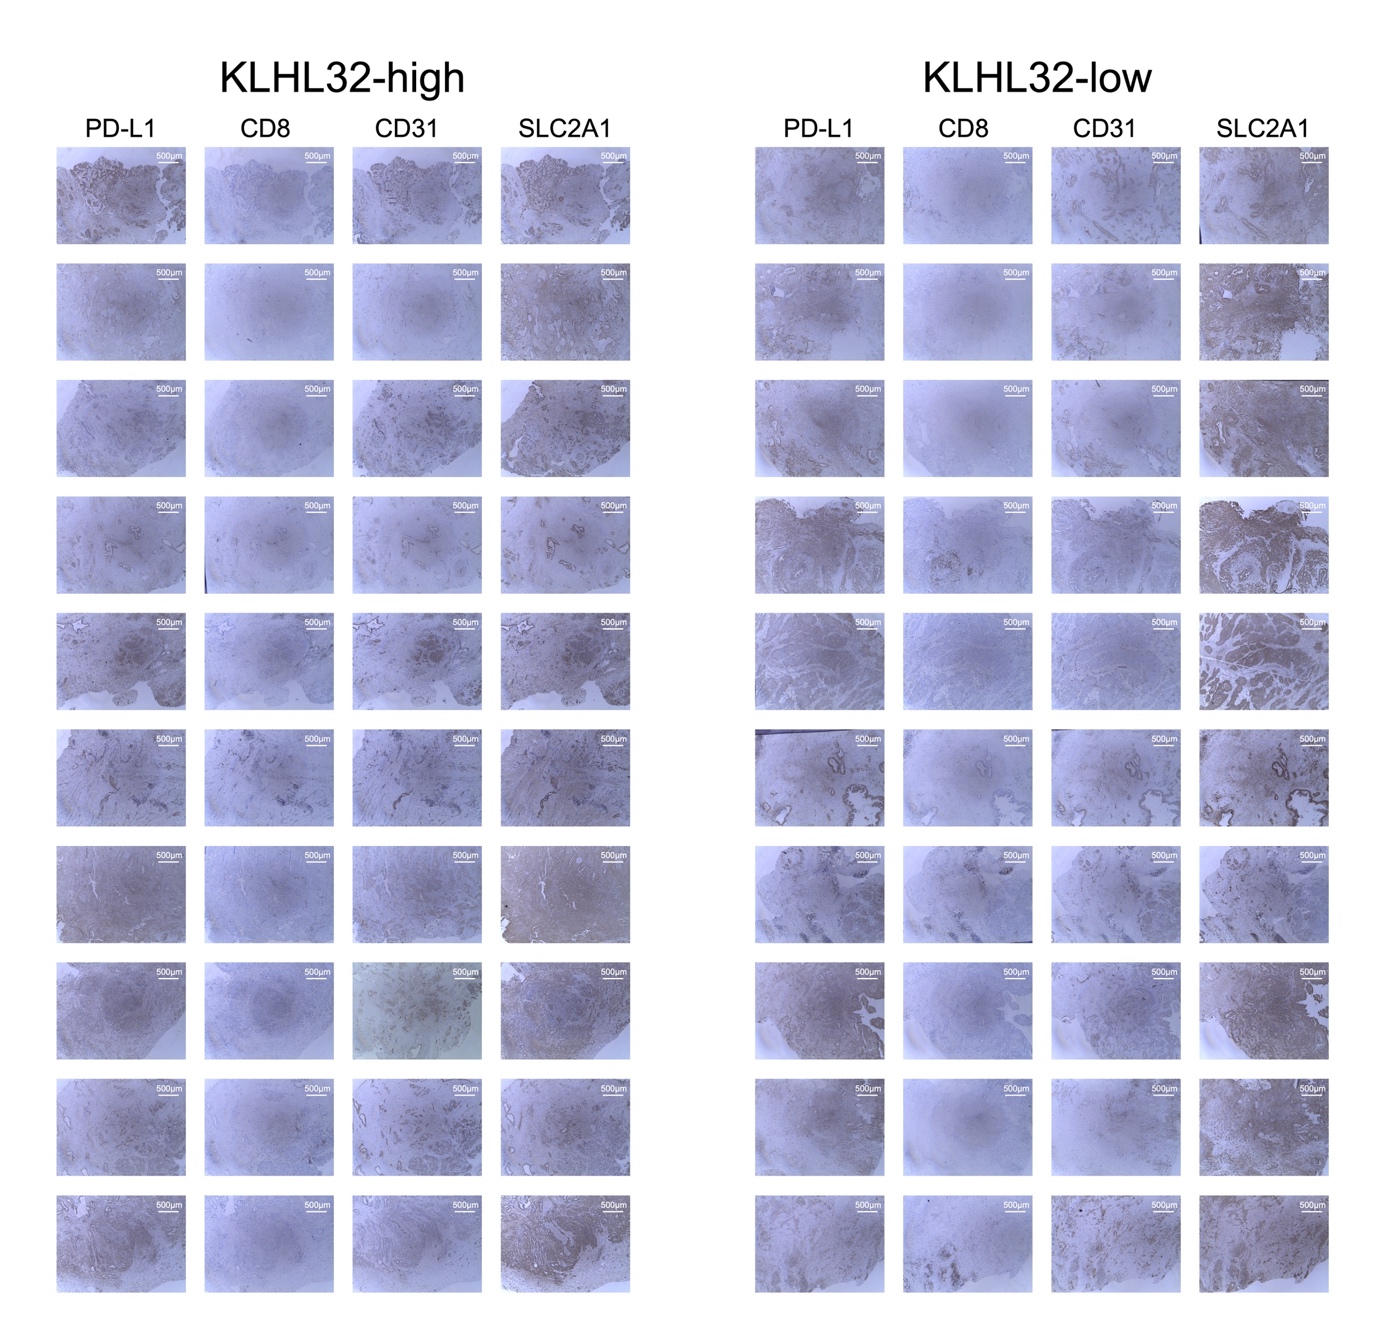


**Supplementary Fig. S8** IHC of PD-L1, CD8, CD31, and SLC2A1 in our single-center retrospective cohort (The patients were grouped by the level of KLHL32)
